# Supplementary material
Source: PubMed Central journal article supplement (PMC3889877)

Kusne et al; Supplementary Fig. S2

DCX (SVZ)

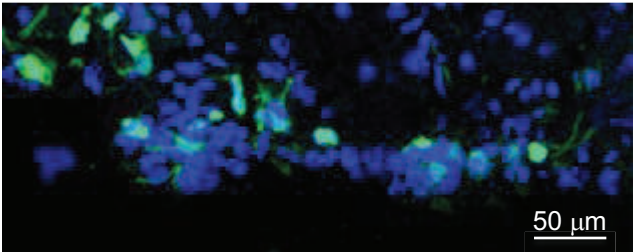

Control

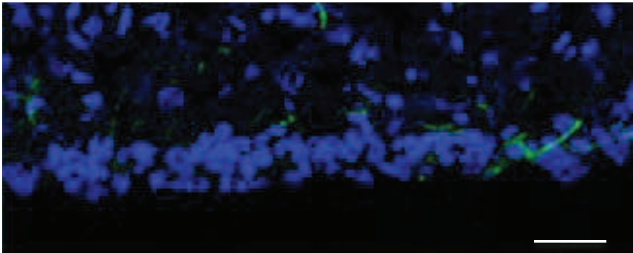

Rapamycin 75 μg/kg

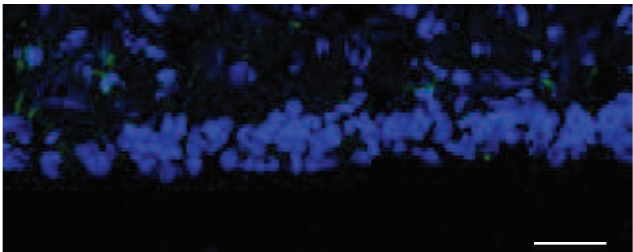

Rapamycin 2.5 mg/kg

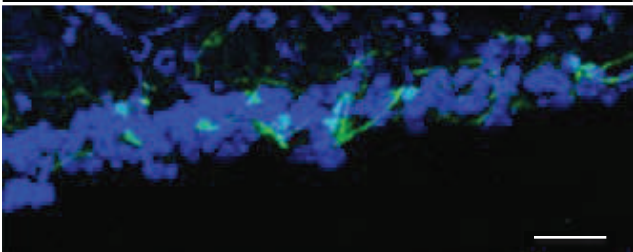

Metformin

Supplement: 11357_2013_9572_MOESM3_ESM.pdf [file 11357_2013_9572_MOESM3_ESM.pdf]
